# Supplementary material for: The CORE Group Polio Project: An Overview of Its History and Its Contributions to the Global Polio Eradication Initiative
Source: PubMed Central journal article supplement (PMC6776098; doi:10.4269/ajtmh.18-0916), 2019-10
Supplement: tpmd180916.SD2.pdf [file tpmd180916.SD2.pdf]

The following are supplemental materials and will be published online only

## Supplemental Appendix II. NGOs that have participated in the CGPP

**Supplemental Appendix II. Table 1. International NGO partners of the CGPP, past and present\***

| <b>International NGO</b>                        | <b>Country(ies) in which the NGO collaborated with the CGPP</b> |
|-------------------------------------------------|-----------------------------------------------------------------|
| Africare                                        | Angola, Ethiopia                                                |
| ADRA (Adventist Development and Relief Agency)  | Ethiopia, India, Kenya, Nepal, Somalia                          |
| AMREF                                           | Ethiopia, South Sudan                                           |
| ARC (American Refugee Committee)                | Kenya, Somalia, South Sudan                                     |
| CARE                                            | Angola, Bangladesh, Ethiopia, India, Nepal, South Sudan         |
| CCF (Christian Children’s Fund, now Child Fund) | Ethiopia, India                                                 |
| CRS (Catholic Relief Services)                  | Angola, Ethiopia, India, Kenya, Nigeria                         |
| IMC (International Medical Corps)               | Nigeria                                                         |
| IRC (International Rescue Committee)            | Ethiopia, Kenya, Uganda                                         |
| Medical Teams International                     | Uganda                                                          |
| PCI (Project Concern International)             | India                                                           |
| Public Health Services System (PHSS)            | Nigeria                                                         |
| Plan                                            | Bangladesh, Ethiopia, Nepal,                                    |
| Salvation Army                                  | Angola                                                          |
| Save the Children                               | Angola, Bangladesh, Ethiopia, Nepal, Nigeria, South Sudan       |
| World Vision                                    | Angola, Bangladesh, Ethiopia, India, Kenya, South Sudan         |

\*The names of the international NGOs that work with the CGPP in Afghanistan have been withheld for security purposes.

**Supplemental Appendix II. Table 2. National NGO Partners of the CGPP, past and present.\***

| <b>COUNTRY</b>      | <b>NATIONAL NGO PARTNER</b>                                                     |                                         |                                                            |                                             |
|---------------------|---------------------------------------------------------------------------------|-----------------------------------------|------------------------------------------------------------|---------------------------------------------|
| <b>Angola</b>       | Ãmmar                                                                           | Assoder                                 | Caritas                                                    | Twayovoca                                   |
| <b>Bangladesh**</b> | CARE/Bangladesh                                                                 | Plan/Bangladesh                         | Save the Children/Bangladesh                               | World Vision/Bangladesh                     |
| <b>Ethiopia</b>     | Alem Tena Catholic Church                                                       | CCRDA                                   | EECMY                                                      | EOC                                         |
|                     | Grarbet Ledekuman                                                               | HCS                                     | OWDA                                                       | PCAE                                        |
|                     | WASDA                                                                           | WeSMCO                                  |                                                            |                                             |
| <b>India</b>        | Adarsh Sewa Samiti                                                              | ADP Ballia World Vision India           | Agra Catholic Diocese Samaj Seva Sanstha                   | Akhil Bhartiya Gramodyog Sewa Sansthan      |
|                     | All India Women's Conference                                                    | Arpan Gramin Vikas Samiti               | AWARD                                                      | BADLAO                                      |
|                     | Bahraich SDA School                                                             | Balia Gram Unayan Samiti                | Bhartiya Kisan Sangh                                       | Bhawani Siksha Prasar Parishad              |
|                     | Carmel School and Hostels                                                       | Centre for Integrated Human Development | Clara Swain Mission Hospital                               | Daud Memorial Christian Gramin Vikas Samiti |
|                     | Diocese of Varanasi Social Welfare Society/Amarvani School for Hearing-Impaired | DISHA Children's Program                | Don Bosco Centre                                           | Dorma Ursline Convent Girl's School         |
|                     | Giffard Memorial Hospital                                                       | Gorakhpur Environmental Action Group    | Gramin Seva Sansthan                                       | Gramodaya Seva Ashram                       |
|                     | Great Public Social Welfare Trust                                               | GVK FHP                                 | Innovative Approach for Social Development Society (IASDS) | Jai Prabha Mahila Vikas Kendra              |
|                     | Jan Kalyan Samiti                                                               | Jan Manas Vikas Sansthan                | Jan Priya Seva Sarnsthan                                   | Janpragati Sansthan                         |

| <b>COUNTRY</b>               | <b>NATIONAL NGO PARTNER</b>                |                                                         |                                                   |                                                        |
|------------------------------|--------------------------------------------|---------------------------------------------------------|---------------------------------------------------|--------------------------------------------------------|
| <b>India<br/>(continued)</b> | Jeevan Jyothi<br>Community/BCM<br>Hospital | Jeolikote St.<br>Anthony's Project                      | Kalyan                                            | Kolhan Mahila<br>Sangathan                             |
|                              | KSRA                                       | Lokmitra                                                | Mahila Jagriti Seva<br>Samiti                     | Malik Educational<br>and Welfare<br>Society            |
|                              | Mamta Samajik<br>Sansthan                  | Manav Seva<br>Sansthan 'SEVA'                           | Manju Mahila<br>Gramodyog<br>Sewa Sansthan        | Mattison<br>Memorial<br>Hospital                       |
|                              | Meerut Sewa Samaj                          | Methodist Girls' Inter<br>College                       | Milan Sangha                                      | Moradabad SDA<br>School                                |
|                              | Mukti Niketan                              | Nav Bharathiya Nari<br>Vikas Samithi                    | NBJK                                              | Noatoli St. Ursula<br>Project                          |
|                              | PANI                                       | Param Jagrit Gramin<br>Vikas Mandal                     | Parivar Vikas                                     | Poorvanchal<br>Gramin Vikas<br>Sansthan                |
|                              | Queen Mary's<br>School, Delhi              | Ram Manohar Lohiya                                      | Ranchi SDA Hospital                               | Samiksha                                               |
|                              | SANSKAR                                    | Sarathi Development<br>Foundation                       | Sarvodaya Seva<br>Ashram                          | Shanti Nagar<br>Hospital                               |
|                              | SHARD                                      | Shivshakti<br>Gramodyog<br>Sansthan                     | Social Welfare<br>Centre, Sundil                  | Society for All<br>Round<br>Development<br>(SARD)      |
|                              | Solanki Gramodyog<br>Sewa Samiti           | Subash Memorial<br>Manav Uthan<br>Evam Sewa<br>Sansthan | Surat Hospital Trust                              | Swami<br>Kalyananand<br>Samaj Kalyan<br>Shiksha Samiti |
|                              | SWARG                                      | Ursuline Convent<br>Girls' School<br>Hostel             | Uttar Pradesh<br>Gramin Mahilia<br>Vikas Parishad | Vigyan<br>Foundation                                   |
|                              | Vikas                                      |                                                         |                                                   |                                                        |
|                              |                                            |                                                         |                                                   |                                                        |
| <b>Kenya**</b>               | ADRA/Kenya                                 | CRS/Kenya                                               | IRC/Kenya                                         | World<br>Vision/Kenya                                  |
|                              |                                            |                                                         |                                                   |                                                        |
| <b>Nepal**</b>               | ADRA/Nepal                                 | CARE/Nepal                                              | Save the<br>Children/Nepal                        |                                                        |
|                              |                                            |                                                         |                                                   |                                                        |
|                              |                                            |                                                         |                                                   |                                                        |

| <b>COUNTRY</b>     | <b>NATIONAL NGO PARTNER</b>                                |                                                                                        |                                                      |                                                  |
|--------------------|------------------------------------------------------------|----------------------------------------------------------------------------------------|------------------------------------------------------|--------------------------------------------------|
| <b>Nigeria</b>     | Federation of Muslim Women Association of Nigeria (FOMWAN) | Archdiocesan Catholic Healthcare Initiative (DACA)                                     | Community Support and Development Initiative (CSADI) | Family Health and Youth Empowerment Organization |
|                    | Healthcare and Education Support Initiative (HESI)         | Network for Integration & Rural Advancement (NIRA) or Community Development Foundation | WAKA Rural Development Initiative                    | Yetim Care Foundation (YETIM)                    |
|                    |                                                            |                                                                                        |                                                      |                                                  |
| <b>Somalia</b>     | Somali Aid                                                 |                                                                                        |                                                      |                                                  |
|                    |                                                            |                                                                                        |                                                      |                                                  |
| <b>South Sudan</b> | Bio Aid                                                    | Catholic Diocese of Torit                                                              | Children Aid of South Sudan (CASS)                   | Christian Mission for Development (CMD)          |
|                    | Community Aid for Development (CAD)                        | Live Well South Sudan                                                                  | Nile Hope                                            | SPEDP                                            |
|                    | UNKEA                                                      |                                                                                        |                                                      |                                                  |
|                    |                                                            |                                                                                        |                                                      |                                                  |
| <b>Uganda**</b>    | IRC/Uganda                                                 | Medical Teams International/Uganda                                                     |                                                      |                                                  |

\* The names of the local and national NGOs that work with the CGPP in Afghanistan have been withheld for security purposes.

\*\* In Bangladesh, Kenya, Nepal, and Uganda, these international NGOs contracted with their local or national affiliates to conduct activities in the CGPP implementation areas.
